# Supplementary material for: Phage Encounters Recorded in CRISPR Arrays in the Genus Oenococcus
Source: MDPI journal article supplement (doi:10.3390/v15010015), 2022-12-20
Supplement: s1 [file s1]

**Table S1.** Phage, bacterial genome and plasmid sequences used in the study.

**Accession numbers of the 134 prophages earlier described [19]**

| Strain characteristics | Genome accession number                                                                                                                                                                                                                                                                                                                                                                                                                                                                                                                                                                                                                                                                                                                                                                                                                                                                                                                                                                                                                                                                                               |
|------------------------|-----------------------------------------------------------------------------------------------------------------------------------------------------------------------------------------------------------------------------------------------------------------------------------------------------------------------------------------------------------------------------------------------------------------------------------------------------------------------------------------------------------------------------------------------------------------------------------------------------------------------------------------------------------------------------------------------------------------------------------------------------------------------------------------------------------------------------------------------------------------------------------------------------------------------------------------------------------------------------------------------------------------------------------------------------------------------------------------------------------------------|
| Lysogens (134)         | ACSE01, AJIJ01, AJTO01, ALAD01, ALAE01, ALAG01, ALAH01, ALAJ01, ALAK01, AZHH01, AZIP01, AZJU01, AZJV01, AZJW01, AZJX01, AZJY01, AZKA01, AZKB01, AZKC01, AZKE01, AZKF01, AZKH01, AZKJ01, AZKL01, AZLG01, AZLK01, AZLN01, AZLP01, CP014324, CP027431, CP038451, JPEK01, JPEM01, LKRT01, LKRU01, LKRV01, LKRZ01, LKSA01, LKSB01, LKSC01, LKSD01, LKSE01, LKSR01, MLKP01, MLKQ01, MLKT01, MLKZ01, MLLA01, MLLB01, MLLD01, MLLE01, MLLG01, MLLK01, MLLM01, MLLN01, MLLO01, MLLQ01, MLLS01, MLLU01, MLLX01, MLLZ01, MLMF01, MLMI01, MLMJ01, MLMK01, MLMP01, MLMT01, MLMW01, MLMY01, MLMZ01, MLNA01, MLNC01, MLND01, MLNE01, MLNH01, MLNK01, MLNL01, MLNN01, MLNP01, MLNQ01, MLNS01, MLNU01, MLNV01, MLNX01, MLNY01, MLNZ01, MLOA01, MLOB01, MLOC01, MLOE01, MLOF01, MLOG01, MLOH01, MLOI01, MLOJ01, MLOL01, MLON01, MLOO01, MLOP01, MLOU01, MLOW01, MLOX01, MLOY01, MLPB01, MLPC01, MLPD01, MLPE01, MLPG01, MLPH01, MLPI01, MLPK01, MLPL01, MLPN01, MLPQ01, MLPR01, MLPS01, MLPT01, MLPV01, MLPW01, MLPX01, MLPY01, SNST01, SNSU01, SNSV01, SNSW01, SNSX01, SNSY01, ULFS01, ULFU01, ULFZ01, ULGA01, ULGB01, ULGC01, ULGD01. |

**Accession numbers of the selected temperate oenophages used for interspecies CRISPR targeting**

| Prophages                   | Lysogenic strains and GenBank assembly | Accession        | Reference  |
|-----------------------------|----------------------------------------|------------------|------------|
| <i>O. oeni</i>              |                                        |                  |            |
| AWRIB508 <sub>proA</sub>    | <i>O. oeni</i> AWRIB508                | GCA_001869485.1  | 19         |
| CRBO14223 <sub>proA</sub>   | <i>O. oeni</i> CRBO14223               | OP964055         | This study |
| AWRIB422 <sub>proA</sub>    | <i>O. oeni</i> AWRIB422                | NZ_ALAG000000000 |            |
| IOEB1491 <sub>proA</sub>    | <i>O. oeni</i> IOEB1491                | GCA_000762065.1  |            |
| IOEBS161 <sub>proA</sub>    | <i>O. oeni</i> IOEBS161                | GCA_000762245.1  |            |
| IOEBB10 <sub>proB</sub>     | <i>O. oeni</i> IOEBB10                 | GCA_000761865.1  |            |
| AWRIB304 <sub>proC</sub>    | <i>O. oeni</i> AWRIB304                | GCA_000286015.1  |            |
| IOEBL26-1 <sub>proB</sub>   | <i>O. oeni</i> IOEBL26-1               | GCA_000762145.1  |            |
| AWRIB847 <sub>proB</sub>    | <i>O. oeni</i> AWRIB847                | GCA_001869725.1  |            |
| AWRIB133 <sub>proB</sub>    | <i>O. oeni</i> AWRIB133                | GCA_001939345.1  |            |
| AWRIB202 <sub>proB</sub>    | <i>O. oeni</i> AWRIB202                | GCA_000309425.1  | 19         |
| AWRIB150 <sub>proB</sub>    | <i>O. oeni</i> AWRIB150                | GCA_001868205.1  |            |
| CRBO11105 <sub>proB</sub>   | <i>O. oeni</i> CRBO11105               | GCA_002462335.1  |            |
| IOEB0501 <sub>proA</sub>    | <i>O. oeni</i> IOEB0501                | GCA_000721875.1  |            |
| CRBO14221 <sub>proB</sub>   | <i>O. oeni</i> CRBO14221               | OP964054         | This study |
| IOEB0205 <sub>proA</sub>    | <i>O. oeni</i> IOEB0205                | GCA_000721835.1  |            |
| CRBO14203 <sub>proA</sub>   | <i>O. oeni</i> CRBO14203               | GCA_002462565.1  |            |
| AWRIB127 <sub>proC</sub>    | <i>O. oeni</i> AWRIB127                | GCA_001868115.1  |            |
| AWRIB424 <sub>proB</sub>    | <i>O. oeni</i> AWRIB424                | GCA_001868555.1  |            |
| CRBO14210 <sub>proB</sub>   | <i>O. oeni</i> CRBO14210               | GCA_002462395.1  |            |
| IOEB0608 <sub>proA</sub>    | <i>O. oeni</i> IOEB0608                | GCA_000761585.1  |            |
| UBOCC315001 <sub>proF</sub> | <i>O. oeni</i> UBOCC315001             | GCA_900518825.1  |            |
| IOEBS28 <sub>proC</sub>     | <i>O. oeni</i> IOEBS28                 | GCA_000761845.1  |            |
| CRBO1384 <sub>proE</sub>    | <i>O. oeni</i> CRBO1384                | GCA_900518765.1  |            |
| IOEB0502 <sub>proA</sub>    | <i>O. oeni</i> IOEB0502                | GCA_000761575.1  |            |
| IOEB9805 <sub>proD</sub>    | <i>O. oeni</i> IOEB9805                | GCA_000761725.1  | 19         |
| IOEBS13 <sub>proD</sub>     | <i>O. oeni</i> IOEBS13                 | GCA_000761785.1  |            |
| AWRIB418 <sub>proD</sub>    | <i>O. oeni</i> AWRIB418                | GCA_000286155.1  |            |
| AWRIB663 <sub>proE</sub>    | <i>O. oeni</i> AWRIB663                | GCA_001869605.1  |            |
| <i>O. sicerae</i>           |                                        |                  |            |

|                                                                 |                                                |                          |                  |
|-----------------------------------------------------------------|------------------------------------------------|--------------------------|------------------|
| 45.3 kb prophage                                                | UCMA15228 <sup>T</sup><br>(1291631-1337008 bp) | NZ_CP029684              | This study       |
|                                                                 |                                                |                          |                  |
| <b>Free phages</b>                                              |                                                | <b>Accession number</b>  | <b>Reference</b> |
| OE33PA                                                          |                                                | <a href="#">MH220877</a> | 18               |
| Vinitor162                                                      |                                                | MF939898                 | 21, 22           |
| Vinitor 27                                                      |                                                | MT859305                 | 21 22            |
| Vinitor 23                                                      |                                                | OP964053                 | 21, 22           |
| OE33PA6                                                         |                                                | OP964052                 | This study       |
|                                                                 |                                                |                          |                  |
| <b>Other bacterial genomes strains</b>                          |                                                |                          |                  |
| <i>L. lactiplantibacillus plantarum</i> QHM38203                |                                                | CP028334.1               | none             |
| <i>Liq. mali</i> LM596                                          |                                                | NZ_CP045035.1            | none             |
| <i>O. alcoholitolerans</i> UFRJ-M7.2.18 <sup>T</sup>            |                                                | NR_134780                | 13               |
| <i>O. kitaharae</i> DSM17330 <sup>T</sup>                       |                                                | NZ_AFVZ00000000          | 14               |
| <i>O. sicerae</i> OAL24*                                        |                                                | NZ_CP029684              | 16               |
| <i>O. kitaharae</i> CRBO2176                                    |                                                | NZ_JANJQP010000000       | 35               |
|                                                                 |                                                |                          |                  |
| <b>Plasmids</b>                                                 |                                                | <b>Accession number</b>  | <b>Reference</b> |
| pOeni 1 ( <i>O. oeni</i> ); 18.3 kb; theta-like replication     |                                                | JX416328                 | 58               |
| pOeni 2 ( <i>O. oeni</i> ); 21.9 kb; theta-like replication     |                                                | JX416329                 | 58               |
| pRSE2 ( <i>O. oeni</i> ); 2.544 kb; rolling-circle replication  |                                                | NC_003201                | 59               |
| pRSE3 ( <i>O. oeni</i> ) ; 3.948 kb; rolling-circle replication |                                                | NC_003099                | 59               |
| pAWRIB429 ( <i>O. oeni</i> )                                    |                                                | NZ_CP084702              | 60               |

\* the genome of *O. sicerae* OAL24 is a metagenome-assembled genome from water kefir.

6

7

**Table S2.** List of primers used in our study.

8

| Target       | Primers               | Phage/lysogenic strain | Sequence                  | Reference  |
|--------------|-----------------------|------------------------|---------------------------|------------|
| <i>intA</i>  | Int <sub>A</sub> F    | IOEB0608               | CGAAGTTTTGACTGGAAAAGAAA   | 19, 24     |
|              | Int <sub>A</sub> R    |                        | TTGAGCGAAGCTGCTATAAGAAC   |            |
| <i>intB</i>  | Int <sub>B</sub> F    | IOEBB10                | AGTTACCACCAAAGGCCATAAAC   |            |
|              | Int <sub>B</sub> R    |                        | GCTCTGACGACTTACCAGCTTTA   |            |
| <i>intC</i>  | Int <sub>C</sub> F    | S28                    | GGCTATGACGCAGGGCGTG       |            |
|              | Int <sub>C</sub> R    |                        | TGACGGGACGTGCTGGCAAG      |            |
| <i>intD</i>  | Int <sub>D</sub> F    | IOEB9805               | CGGAAAATATTATCAAGCACGAG   |            |
|              | Int <sub>D</sub> R    |                        | TTCAGCGTGATCTTTACCAAAAT   |            |
| <i>intE</i>  | intE F                | CRBO1384               | GATTTTTTGCCTGTAACGGTG     |            |
|              | intE R                |                        | CGCAGGTATTCATGAGGATTC     |            |
| <i>intF</i>  | int <sub>F/OC</sub> F | UBOCC31005             | GATAGCAACACTGGAATGCC      |            |
|              | int <sub>F/OC</sub> R |                        | GCTATGGACGGTTATGGCAA      |            |
| <i>tmp1</i>  | tmp1 F                | IOEB B10               | TGGAAGTTTGCTTAGTTGCAG     | 24         |
|              | tmp1 R                |                        | CAGCGGATGAAAACCATTGAGA    |            |
| <i>tmp2</i>  | tmp2 F                | IOEB L26               | GGTTGGATCGGAAATTGCTA      |            |
|              | tmp2 R                |                        | TGCAGCTATGGCTGTAATCG      |            |
| <i>tmp3</i>  | tmp3 F                | IOEB 0608              | TGGTTCTGTTGTTCTCTGGTATT   |            |
|              | tmp3 R                |                        | GATTTAGAWGCCAGCTTTGCTA    |            |
| <i>tmp4</i>  | tmp4 F                | IOEB S28               | CAACAAGCTGTTTTGGATCGC     |            |
|              | tmp4 R                |                        | TAGCTTCTGCCATACTCTTAGC    |            |
| <i>tmp5</i>  | tmp5 F                | IOEB 9805              | GGCCAAGGTACCGCAAAG        |            |
|              | tmp5 R                |                        | CTCTGCTTTTCCAGTTTGCTG     |            |
| <i>tmp6</i>  | tmp6cri F             | Vinitor162             | ATTCGCTCACAGGGGCAAAA      | This study |
|              | tmp6cri R             |                        | CCAAATTAGCAGTTGTCATTGTGCC |            |
| <i>tmp7</i>  | tmp7 F                | UBOCC31005             | TTGCAAGCTGAAGGTAAACAAT    |            |
|              | tmp7 R                |                        | GCAGCTGTTTCATTGACTCTAA    |            |
| <i>lm1</i>   | LM1_F                 | IOEB0608               | AAAAGCATGATTTCCCGTTG      |            |
|              | LM1_R                 |                        | TGGCAATTCTATCAGGCACA      |            |
| <i>lm2</i>   | LM2_F                 | IOEB0501               | CAATGGATCAGCTTGCAGAA      |            |
|              | LM2_R                 |                        | GGTGCATCCATAGCAACTGT      |            |
| <i>lm3</i>   | LM3_F                 | IOEB0502               | GAAAATGCAGTTCCCGAAAG      |            |
|              | LM3_R                 |                        | CGCACGGTTTTATCAAGACA      |            |
| <i>lm4</i>   | LM4_F                 | CRBO14203              | TGATAAGATCCAAAGTGAAGCG    |            |
|              | LM4_R                 |                        | TCATCGGTCATATCAGGATCAG    |            |
| <i>lm5</i>   | LM5_F                 | IOEBB10                | CTGGTGTAATGTGCTAATCGT     |            |
|              | LM5_R                 |                        | CCCGAATCAAGCAACTTCTTAA    |            |
| <i>lm6</i>   | LM6_F                 | IOEB9805               | AAGACCCAAAATCAGGCAATTT    |            |
|              | LM6_R                 |                        | AATTTGTTTCATCAGTGGCACTT   |            |
| <i>rep1</i>  | Rep1_F                | IOEB0608               | TGAACAGTGACGAAAAACGA      | This study |
|              | Rep1_R                |                        | TGCTTTCTCCTCTGTCTTTTCTT   |            |
| <i>rep2</i>  | Rep2_F                | OE33PA                 | ATTGGAATTGCCAGACGAAG      |            |
|              | Rep2_R                |                        | CTTTCGCAAGCTTAGCGTCT      |            |
| <i>rep3</i>  | Rep3_F                | AWRIB418               | ATTACCGATGAAACTTTGACCG    |            |
|              | Rep3_R                |                        | TTCTAATTGCTTGACTCCCTGA    |            |
| <i>rep4</i>  | Rep4_F                | UBOCC31005             | ACCAAACTCAGTCAAGACAAC     |            |
|              | Rep4_R                |                        | CTGGTGCTTCTTTACTTTCA      |            |
| <i>rep5</i>  | Rep5_F                | Vinitor 162            | AGGCGATATCAAACAAGCAATT    |            |
|              | Rep5_R                |                        | TGTCATCCAGTCACGGGTA       |            |
| <i>terS1</i> | TerS1_F               | L26-1                  | TGATCTGCTCGGCAGTAGAA      |            |
|              | TerS1_R               |                        | ACACGCTGGAAGGAAAAGAA      |            |
| <i>terS2</i> | TerS2_F               | IOEB1491               | TCTTAATTCGGGCACCAAAG      |            |
|              | TerS2_R               |                        | TTCAAGATTCCACCGGAAAG      |            |
| <i>terS3</i> | TerS3_F               | IOEB0608               | TTCAAGATTCCACCGGAAAG      |            |

|              |         |             |                        |
|--------------|---------|-------------|------------------------|
|              | TerS3_R |             | TCITTCGGCTGAACGATTTT   |
| <i>terS4</i> | TerS4_F | IOEB0502    | GCCATGTGGAGAAAAATCGT   |
|              | TerS4_R |             | TAACCAGCAAAATCCGTTCC   |
| <i>terS5</i> | TerS5_F | IOEB9805    | AGACGGCGTAATAGTTGAGTTA |
|              | TerS5_R |             | CATCTTGATCGCTTTCTTTCCA |
| <i>terS6</i> | TerS6_F | UBOCC31005  | CCTATGGCCATATTCAAAAGCA |
|              | TerS6_R |             | CCCAACTGACTACCAAGATTG  |
| <i>terS7</i> | TerS7_F | Vinitor 162 | ATCAAGCTGGTAAAGACAATGG |
|              | TerS7_R |             | CTGTTCCATGACTTCGATTGT  |
| <i>doc</i>   | Doc_F   | IOEB0608    | TAACGGCCTTGATAGCGTTT   |
|              | Doc_R   |             | TTGAGGCATCCTTCCTCAG    |

**Table S3.** List of spacers in the four CRISPR loci identified in the *Oenococcus* genus.

**Type II CRISPR in *O. kitaharae* DSM 17330<sup>T</sup>**

|     |                                 |
|-----|---------------------------------|
| K1  | TGCACCATGTGCCATATCATCGGCATTGCC  |
| K2  | ATAATCACCCAGCTAGGATTTGTACATGGC  |
| K3  | AAGAATTCTGTCAAATGCTAAAGACAGATA  |
| K4  | CACCACTTTTTACAAGCTCTGTTCTAATGG  |
| K5  | GCTATATCGGCCAAACACAAGACCAACAAG  |
| K6  | TTGCTTCTGTCTCGGAATGCCGTGACTCAAG |
| K7  | AAAGTTTGGTCAATTTTTTACCTCAATCAT  |
| K8  | TTCAAACAAAGCAATTGGTCGAAACATTGG  |
| K9  | TGATACGATTGACTTTCAATATCACCAAAC  |
| K10 | TAATTGATACAAACGGCGAAGTGTTAAGCA  |
| K11 | ACTGTGATTTGCCTGTACGTGTGAAAAACG  |
| K12 | TGGAACGGTGCTGAGAACCAATGGTTATGC  |
| K13 | GTGATATTTGGATTAGGTGAAACAGAAACG  |
| K14 | ACAACCTCAACTATTTGAGTGTTGGCAAGC  |
| K15 | GCAACGAATAGGCCGTACCGACCTATTCGT  |
| K16 | AAACGGATATTATCAATTTGAGGTAATCGC  |
| K17 | TTCAGTGGCTCATAACCCATTGGCATTGT   |
| K18 | ATGATTGAAAACAATCTTGCAGATAAAAG   |
| K19 | AACGCATTTGCTGGAATTCGGACACGCCAC  |
| K20 | AGTACAATACGGATGAAATCAGCATGTCTGA |
| K21 | ATTCATGGGCTTAGGCACACACATGCGAGT  |
| K22 | ACAATCGTGTGCTTATCGCCACGCCATGGC  |
| K23 | GGTTGGATGACCATAATTTGCTGGGCTTTG  |
| K24 | AATCCTTGAGCTAAATTACCGTTAATCGTA  |
| K25 | TTTATTACTCCTTTCAAGCTGACTGTTGGG  |
| K26 | TAGCTGCACTGGCAGAAACACGGGCATTAA  |
| K27 | AAAATATCGTCAATACACAATCAGAAGGTT  |
| K28 | TTTCTGTCATCTCGATCCTTTCTAAATTAA  |
| K29 | AGAATGCGTTGTTTATCAAGGCTCAAAGTG  |
| K30 | AGTTATCAAATCAAAATCGAGAGTATTAAC  |
| K31 | GAGACCACTGGCTCTATGATGGAAAAGTAG  |
| K32 | CTACTTCTATTGAAGTAGTACTACCAAGCA  |
| K33 | AAGTAAATGGTACAAAAGCTCTCACAACGC  |
| K34 | TCTTGGCCGGTATCGGAAAGGGCATTGCTA  |
| K35 | AATTGCTTAGAGAGCGATTTTCAAACAAT   |
| K36 | TACCACATTCTTCAACAGACTATCAGTCCT  |
| K37 | AACTAATTTATTCCTTTTAAGGAACATATT  |

|     |                                      |    |
|-----|--------------------------------------|----|
| K38 | GCGTATATGCTCAAACCGGAGTTCATAGAA       | 53 |
| K39 | ATAGCGACGTTGGCTAAACAACCAAATGGG       | 54 |
| K40 | TTTATCAGGTTTCTCTAAATAGTTCTGCCA       | 55 |
| K41 | TACAAAGCCGTTGGTAATTTATCCGGTTCA       | 56 |
| K42 | TTCACTTCCTCTTTTCTGAGCCCAGAAAAT       | 57 |
| K43 | AAGCGGTGGTTCATGAAGCTCGCCAAAATT       | 58 |
| K44 | CTGATAAACGACGGAATTTTGTCCCTTGAC       | 59 |
| K45 | ATTTCAAAGCAATTTTCGCAAAAAGATCAAA      | 60 |
| K46 | GAAAGCAAATCTTATCTCGTGACGCAGGTG       | 61 |
| K47 | TAGAATCAATCCCCGTGTGCTTCGTCTCTTG      | 62 |
| K48 | GAAGGCTACATCAAGACTGGTGTGCGATCAT      | 63 |
| K49 | CCGTTGGCATGCAACCAGATGCCAACAACC       | 64 |
| K50 | AACCGTTCAGTCCATAAACGCCGGCGCTAT       | 65 |
| K51 | CGGCAAAGCGGAATAATCTTGTCACCTTCG       | 66 |
| K52 | TACAGCTTACAAAATACATAAAAAGTATGCA= K55 | 67 |
| K53 | TTATTTAAAAGCCGGTCAACATCCTTTTAA       | 68 |
| K54 | CATTTTTATCTGTAATGTCACTAAAAATAT       | 69 |
| K55 | TACAGCTTACAAAATACATAAAAAGTATGCA= K52 | 70 |
| K56 | TTTCCCGTGCGTGGGAAAACCCTGATTAA        | 71 |
| K57 | CATGCTGGTCTTGTATGACACCAAACATGA       | 72 |

## Type II CRISPR in *O. ciseri* UCMA 15228<sup>†</sup>

|       |                                       |    |
|-------|---------------------------------------|----|
| S2.1  | AGAAATTTTGAATTTATATAATCACAAAG         | 73 |
| S2.2  | GCGGTTCAAAGACTGCGATCAGTTTAATTC = S1.3 | 74 |
| S2.3  | GCGGTTCAAAGACTGCGATCAGTTTAATTC = S1.4 | 75 |
| S2.4  | GGACTGCGAAGACAATCGGCAAGAAATCAC        | 76 |
| S2.5  | GTATCGGTGTCTTCATCAAAGTCTGGTTCG        | 77 |
| S2.6  | GCGGTCTAAGTCGTATTGAAGCCAGTGGCA = S1.7 | 78 |
| S2.7  | GCGGTCTAAGTCGTATTGAAGCCAGTGGCA = S1.6 | 79 |
| S2.8  | TAATAATACCAGCTGCGGGAATATTTAGTT        | 80 |
| S1.9  | GCGATTGATGCGCTCCACCTCGCTGGTGTT        | 81 |
| S2.10 | AGTATCAGCGAGCTTATACCGCTCTGTCAT        | 82 |
| S2.11 | ATCAATGAAAACATGAAAACCCCTTACACT        | 83 |
| S2.12 | CCATTCTGTGACTCCTTTTCTAGCTTTTCTTG      | 84 |
| S2.13 | GAACCTCGGACTTGCTAAATCTTTTTTGTA        | 85 |
| S2.14 | TGGACGTCGAAAATGCACGCTGGCGTATCA        | 86 |
| S2.15 | ATGGTTACGATAACTTGTGGCTGCCTTAG         | 87 |
| S2.16 | GAATATCCGAGCTTCTCTATCACACTTGCG        | 88 |
| S2.17 | ATTTCAAACGAAGCCATCGCAGAATTGACA        | 89 |

|       |                                |     |
|-------|--------------------------------|-----|
| S2.18 | GAGGGAGCTATTGGTAACTTGCAAGCCAAC | 95  |
| S2.19 | ATGGAATCAACGAAGAGCAAGCCCAAGAG  | 96  |
| S2.20 | TTCATATCATCTATTAAATCACTATATAAA | 97  |
| S2.21 | TATCTGACGCTGTTGGTATACAAGTCACAA | 98  |
| S2.22 | CCAACTAATTGCTTTATTGATATTAGCAAT | 99  |
| S2.23 | TGAAAGACGACTACGTTTACGGACAATTGG | 100 |

### Type I CRISPR in *O. ciseriae* UCMA 15228<sup>T</sup>

|              |                                   |           |
|--------------|-----------------------------------|-----------|
| S1.1         | CTTATAACCAATGACAAAGAAAGCAATGTTAT  | 105       |
| S1.2         | TTATTTTTCAAGGCAAAGATGATGGCCGTTGT  | 106       |
| S1.3         | GCACCGAGTTCGTTGCGCGTTTCGTTTATTTT  | 107       |
| S1.4         | TTTTTGATTTTCGTCATCGATATTTTAAATTGG | 108       |
| S1.5         | CGATTGACATTGTCGTTTCGGCATGATCCGACT | 109       |
| S1.6         | TGCTTTTCAAACCGTTTACCCAATTTTCTACC  | 110       |
| S1.7         | TGTGCTGCTCATGGCTTTCGTCATGACTTTACC | S2.17 111 |
| <b>S1.8</b>  | TTCATCAAACAGCCCTAATTTTCCATTTGTCC  | S2.18 112 |
| S1.9         | AATCGTAATATGCGTCGAGCAATCAACTTGCA  | 113       |
| S1.10        | TTTTAAGTATGCCAGCAGGAACATTGGAGCGAC | 114       |
| S1.11        | TTATAAGCACCTCTTCATTATGCAGGCGGGC   | 115       |
| S1.12        | CAAAATGCTTCTCGAGGCGTGAATGATGGAAT  | 116       |
| S1.13        | ACCTTTTCATGTTTATCTTAACTTTCGGCCAC  | 117       |
| S1.14        | TGGCTATTTTGGCATCTGCCTGGGCTTTTTCT  | 118       |
| S1.15        | CCGCTGATTTACCAGATGATCTAAGTGATAAA  | 119       |
| S1.16        | ACAACGTTGATGAAAAATACGTTGATTGGACT  | 120       |
| S1.17        | TGTGCTGCTCATGGCTTTCGTCATGACTTTACC | S2.7 121  |
| <b>S1.18</b> | TTCATCAAACAGCCCTAATTTTCCATTTGTCC  | S2.8 122  |
| S1.19        | CTCTTTTTGCGCTTGCGGTTGACCCTCCCACC  | 123       |
| S1.20        | GCAGAGGTTAAGGAACTTTGAAGTTATCATG   | 124       |
| S1.21        | TACATAAATATCAGTATTGCAAGTTTAAACGT  | 125       |
| S1.22        | TTCCATCAGATGAAGTTTTGCCGTTCTAAGCG  | 126       |
| S1.23        | TACACGACAATGACCAGAACTATGAATTATTG  | 127       |
| S1.24        | TGGAACGGTATTATCGTTGTGGCCACGGCCGT  | 128       |
| S1.25        | TCGCCTTTTAAGGTTTTAACGGCGTACTTGCT  | 129       |
| S1.26        | TGGTTGATGCAGCCAAAAATCTGCGCTTAAGC  | 130       |
| S1.27        | ATTCGGCAATATTTTCAATTCATGAATTTTC   | 131       |
| S1.28        | CCACCTTTGACAGCGGTTACTGAAGACTGGCT  | 132       |
| S1.29        | AAGAAAGCCTAACCGAAAAATACCAAAATTAT  | 133       |
| S1.30        | AATGTGCTTGATTCAAGCTATGGCAATGACTC  | 134       |
| S1.31        | TGATTTGCAAATCATCGAGGAGGAAAAAATG   | 135       |
| S1.32        | TTTCATTTAAATATGCATGCTGATGATGACGG  | 136       |

|              |                                   |               |     |
|--------------|-----------------------------------|---------------|-----|
| S1.33        | ACGGTCACATTATCGCCAACATACGATCAGGA  |               | 137 |
| S1.34        | TCCCATGGGGTTCAGGCCTGAAAAGTGTGCT   |               | 138 |
| S1.35        | CTTTTCCTGCCGTTTCTGCCATTGCTTGCTCC  |               | 139 |
| S1.36        | CCCACCAGCTGTCTGGCATTGAGATAGTTCGT  |               | 140 |
| S1.37        | GTAGTCATGGACAATTCAGCACAGATTCAATC  |               | 141 |
| S1.38        | GATTCAAAAAATTAGTTTAAATCGTCGTATCA  |               | 142 |
| S1.39        | GTCATCTAACAAGCTTACAATTTGGTCCCTTA  |               | 143 |
| S1.40        | TTAATGGTTACTCACAGGGCGAAGCTACATTT  |               | 144 |
| S1.41        | TTGCACGTTGGCTATGAATAGCACATATAGCC  |               | 145 |
| S1.42        | CATCATCAGGATCTTCCCGTTCAATTTTGTT   |               | 146 |
| S1.43        | ATTAAAACGTAAATATAACATTCTAAAAGCAG  |               | 147 |
| S1.44        | ATGGCCTAACCATACGAATGGGTGGGAAGCCC  |               | 148 |
| S1.45        | GAATTCAGGTTATGAACCAGAATCTTTGCCAT  |               | 149 |
| S1.46        | GATCCGTTGCATGATTCTTATGCAGCTGCCTT  |               | 150 |
| S1.47        | CAAGTTTGATAAGTTAGTTATGTTTAGTGGA   |               | 151 |
| S1.48        | CAGGAATTTTCCAGAGAACCAGACCTATACCA  |               | 152 |
| <b>S1.49</b> | ACGGTACGATTCCGCTCTATCAGTCAACGATT  | S1.56 & S1.62 | 153 |
| <b>S1.50</b> | ATCAGGTGGGCGTTTCTGACGCTATGAACATT  | S1.63         | 154 |
| <b>S1.51</b> | TGACATGCACTGGTCGGAGATGTTTTTTGATG  | S1.64         | 155 |
| <b>S1.52</b> | AAATTCACAGCACCGACCATGTGCGGTCTGAT  | S1.65         | 156 |
| <b>S1.53</b> | TCAGCTTCTCGAGACAAAGGTGCAATCTGATA  | S1.66         | 157 |
| <b>S1.54</b> | AAAAATTAATAATTTTTCGCCAGATTCAGCA   | S1.67         | 158 |
| <b>S1.55</b> | ATTGAGACGGCCCTACATAAAATTTGAAGAG   | S1.61         | 159 |
| <b>S1.56</b> | ACGGTACGATTCCGCTCTATCAGTCAACGATT  | S1.49 & S1.62 | 160 |
| S1.57        | ATCGTGTTAATGAAGCCTTATCAGAAGTTACA  |               | 161 |
| S1.58        | TCAGCTTTGTGATGGCTAACAAGGACTGGCTT  |               | 162 |
| S1.59        | TAGCTCACGACGAAGGCTTGACAGAGTTTGCC  |               | 163 |
| S1.60        | TTGCAAGAGGCTTTGGGACAATATTTTGATAA  |               | 164 |
| <b>S1.61</b> | ATTGAGACGGCCCTACATAAAATTTGAAGAG   | S1.55         | 165 |
| <b>S1.62</b> | ACGGTACGATTCCGCTCTATCAGTCAACGATT  | S1.56 & S1.49 | 166 |
| <b>S1.63</b> | ATCAGGTGGGCGTTTCTGACGCTATGAACATT  | S1.50         | 167 |
| <b>S1.64</b> | TGACATGCACTGGTCGGAGATGTTTTTTGATG  | S1.51         | 168 |
| <b>S1.65</b> | AAATTCACAGCACCGACCATGTGCGGTCTGAT  | S1.52         | 169 |
| <b>S1.66</b> | TCAGCTTCTCGAGACAAAGGTGCAATCTGATA  | S1.53         | 170 |
| <b>S1.67</b> | AAAAATTAATAATTTTTCGCCAGATTCAGCA   | S1.54         | 171 |
| S1.68        | ATTACGTCAATGATTTTCATTGATTGAAGCATT |               | 172 |
| S1.69        | TAGCAGCGGCACTAAAAATAGATCCTTGGGAG  |               | 173 |
| S1.70        | GGTTACTTCAAGGAACAGCTTTTGTGCTGCTA  |               | 174 |
| S1.71        | CCTCAGCTTTTGTCTTCCGCTGGGCTGCTTCG  |               | 175 |
| S1.72        | CGTGAGCTGCTGCAGCAAATGTACGGAAAATC  |               | 176 |
| S1.73        | AAATGACCAAAAAACTTTTTGCGAATCTGGGC  |               | 177 |
| S1.74        | TGCAATCTTGAGCAATCAGCAGGTAAAGGGT   |               | 178 |



|        |                                   |     |
|--------|-----------------------------------|-----|
| S1.75  | CCGTTAGTTTGACTAATTGGGACTTTAGTTGA  | 179 |
| S1.76  | CTACAATTAGATTCTATTCTAGTTATCAAAC   | 180 |
| S1.77  | TCCCATGGGGAATAAATCTGAAAAGTGTGCT   | 181 |
| S1.78  | AACAACCTAACAGAATTAATCGGTGGCCTGTT  | 182 |
| S1.79  | CTAATTTTATTTGTCATTTTGTACCTCTTTA   | 183 |
| S1.80  | AAGCTAGACGAAACACCACTATTGACACTGGC  | 184 |
| S1.81  | TTGTCTCGATGAATACGGTCATATTCAGTTTG  | 185 |
| S1.82  | TATCAGAGTCGACGCTCCCGCTGTAACCGCCG  | 186 |
| S1.83  | TGTGCCTCAAGCCATGAAAAGTTATTTGTTTA  | 187 |
| S1.84  | GGTTTCCTGTCCAGTTTCAAAGAAAACTGTC   | 188 |
| S1.85  | TCAGCCCAGTTCGTCGAAATGAACTGCGAAAT  | 189 |
| S1.86  | ATTTATTAGGACGAGGGACTCCGATGGTGAAC  | 190 |
| S1.87  | ACCATCGTTTGATAAGTCGAGCTCTCAACTTT  | 191 |
| S1.88  | GACTAGCAACAAATCGACAACAAAAGATCCTT  | 192 |
| S1.89  | TTTCTAGTTCTGATAACTAAGTCAGAATTACC  | 193 |
| S1.90  | GAACGGTTAAATTAACACTTAATGGAGTAGTA  | 194 |
| S1.91  | TTCAACAAGACGCTGACAATGCCAACTAGAT   | 195 |
| S1.92  | TTCAAAAAGGGAACGTTAACCCTGCCACAGAT  | 196 |
| S1.93  | AAGCACGTATTTCCGGTTCGCCAGCCATCACG  | 197 |
| S1.94  | TTTGTTTTGGGCTTGTCTATGGGCGTACTGAT  | 198 |
| S1.95  | CTCAGTCATTTTCGACCGTGTATCGCTTGTTAT | 199 |
| S1.96  | AGCCCTATTTTATCTTTTCCCCGTCAATATAT  | 200 |
| S1.97  | TTTTTTATCAGTCAGCCCAAACAATTCCCGAT  | 201 |
| S1.98  | CAAGAAGTCCACTAATCACTGTCGTCGCAGC   | 202 |
| S1.99  | TTGATTTGCTGCAATGGCTTGTGTTGGCTTAG  | 203 |
| S1.100 | GTTGGCGTGGCAATACTTGCCGTGCCGGTACC  | 204 |
| S1.101 | ATCCTGTTATGTGATTCAATTGTACAGCACACA | 205 |
| S1.102 | CAAAGCCTTGGGCCATAAAACCCAAGCCTTCCC | 206 |

#### Type I CRISPR in *O. alcoholitolerans* UFRJ-M7.2.18 (chromosomal DNA)

|     |                                |     |
|-----|--------------------------------|-----|
| A1  | CCCATTTTAATCATTTGCAGATAATCGACT | 209 |
| A2  | CTAACAGCTAAACAGAACTCTATTGCTAGC | 210 |
| A3  | CAAAACGGTAAAAGTAACGCCAAAGGGTCA | 211 |
| A4  | CGTTAGATAAAATCCATCAGCAGGAGAAGT | 212 |
| A5  | CAAAGTCAGACAACCGTTGTATATATTGGC | 213 |
| A6  | CATCAATTCATTTAATTTATCATAATCAAT | 214 |
| A7  | CAACAGTTTCTATCGTACTCAAAGGAACCC | 215 |
| A8  | CTTGAATTGCCAAAAGAAAAGTGGGCGTTA | 216 |
| A9  | CTATGGCGATAAATTCAACTGATTCAAATG | 217 |
| A10 | CTCTAAATATGGTCAACTATGATGCATATG | 218 |
| A11 | CACCAACTGCCAGCTGTTCCAGAAGTATAA | 219 |

---

|                                                                               |                                               |     |
|-------------------------------------------------------------------------------|-----------------------------------------------|-----|
| A12                                                                           | CGTCACATCGACAAATATAGCTAACGGGCT                | 221 |
| A13                                                                           | CCTCGGACTACCTCCACAATGGTGTTGACC                | 222 |
| A14                                                                           | CTTATTAAAATGATATATACTTGTTCTCGTT               | 223 |
| A15                                                                           | CTGAGAAGTTTGGCGAAATCAAACCCTCTG                | 224 |
|                                                                               |                                               | 225 |
|                                                                               |                                               | 226 |
| <b>Miscellaneous in <i>O. alcoholitolerans</i> UFRJ-M7.2.18 (plasmid DNA)</b> |                                               | 227 |
| Plasmid II                                                                    |                                               | 228 |
|                                                                               | AACGGACGCTAATCGGACGCTAATTAAATAACGAAAGTAGCAAAA | 229 |
|                                                                               |                                               | 230 |
| Plasmid III                                                                   |                                               | 231 |
|                                                                               | TGGGCGGTCTTGTCAACGGACTTATGCG                  | 232 |
|                                                                               |                                               | 233 |
|                                                                               |                                               | 234 |
|                                                                               |                                               | 235 |

**Table S4.** Rapid sub-typing scheme amongst oenophages showing 27 distinct patterns.

| Prophages             | Int<br>A-F | LM<br>1-6 | Rep<br>1-5 | TerS<br>1-7 | TMP<br>1-7 | Doc | Pattern |
|-----------------------|------------|-----------|------------|-------------|------------|-----|---------|
| IOEB0205              | A          | 1         | 1          | 1           | 1          | +   | 1       |
| OE33PA6               |            | 1         | 1          | 2           | 1          | -   | 2       |
| IOEB0608              |            | 1*        | 1*         | 3*          | 3*         | +   | 3       |
| IOEB1491              |            | 2         | 1          | 2*          | 1          | -   | 4       |
| IOEB0501#             |            | 2         | 2*         | 1           | 1          | -   | 5       |
| L26-1                 |            | 2*        | 2          | 1*          | 2*         | -   | 6       |
| AWRI B422             |            | 2         | 2          | 2           | 1          | +   | 7       |
| CRBO14223#            |            | 2         | 2          | 2           | 1          | -   | 8       |
| S161#                 |            | 2         | 2          | 2           | 2          | -   | 9       |
| IOEB0502              |            | 3*        | 1          | 4*          | 4          | -   | 10      |
| CRBO14203             |            | 4*        | 1          | 1           | 1          | +   | 11      |
| AWRIB508#             |            | 4         | 2          | 2           | 1          | -   | 12      |
| AWRIB847#             |            | 1         | 2          | 1           | 2          | -   | 13      |
| CRBO14210             |            | 1         | 2          | 3           | 3          | -   | 14      |
| AWRI B424             | B          | 1         | 2          | 3           | 3          | -   | 15      |
| CRBO14221             |            | 4         | 1          | 1           | 1          | -   |         |
| AWRIB133              |            | 4         | 2          | 3           | 1          | -   |         |
| CRBO11105#            |            | 5         | 2          | 1           | 1          | -   |         |
| AWRI B202#            |            | 5         | 2          | 1           | 1          | -   | 17      |
| OE33PA                |            | 5         | 2          | 1           | 1          | -   |         |
| AWRIB150#             |            | 5         | 2          | 1           | 1          | -   |         |
| IOEBB10#              |            | 5*        | 2          | 2           | 1*         | -   | 18      |
| AWRIB127*             |            | 1         | 1          | 1           | 1          | -   | 19      |
| AWRIB304              |            | 1         | 1          | 2           | 2          | -   | 20      |
| S28                   | D          | 1         | 1          | 3           | 4*         | -   | 21      |
| IOEB9805              |            | 6*        | 3*         | 5*          | 5*         | -   | 22      |
| AWRIB418              |            | 6         | 4          | 5           | 5          | -   | 23      |
| CRBO1384              | E          | 1         | 1          | 4           | 4          | +   | 24      |
| AWRI B663             |            | 4         | 3          | 5           | 5          | -   | 25      |
| UBOCC31005            | F          | 1         | 4*         | 6*          | 7*         | +   | 26      |
| Vinitor (162, 27, 28) |            | -         | 5*         | 7*          | 6*         | -   | 27      |

Phages belonging to clusters I and II are in orange and blue, respectively; #, phages from cluster I.1 which contain several protospacers; \*representative LM, Rep, TerS, TMP and Doc proteins (see Figure 2).
